# Supplementary material
Source: publisher figshare collection journal article supplement (https://gsajournals.figshare.com/ndownloader/files/31562444)
Supplement: Supplementary file 1 [file 31562444]

**Table S2.** Primer sequences used in Fig.3C

|  | **Forward** | **Reverse** |
| --- | --- | --- |
| ***RpL32*** | **AAGATGACCATCCGCCCAGCATAC** | **ACGCACTCTGTTGTCGATACCCTTG** |
| ***β-tub*** | **AGTTCACCGCTATGTTCA** | **CGCAAAACATTGATCGAG** |
| ***Gapdh2*** | **CGCTGCCCAGAACATCATTC** | **GAAACGACCTCCTCATCGGT** |
| ***CG31999*** | **TGCCGCCAGAATCTTAACTT** | **ACGACCATCTGGAGGTATCA** |
| ***yellow-h*** | **TCCTCGTTGGAAGAATGGTG** | **AGCCAAATTCGATCACACCT** |
| ***CG1674*** | **CAGCAGTGCGAAATTCACTC** | **TCAACCCAGTTGGCTTTGAT** |
| ***dpr7*** | **TTGGAGCGACCTTTCTTTGA** | **TACGCATCCATGATACCGTG** |
| ***RhoGAP102A*** | **GGATACCAAACAGGGTCAGG** | **CAACTGTCTGTTTTCTGCGG** |
| ***NfI*** | **GAAATTCCCAGGCTACCACA** | **TGGCAACGCTGGTACTATTT** |
| ***Ubx*** | **AGGACTGCCTGAACATCAAG** | **GGATTGTTCTGTCCGTTTGC** |
| ***abd-A*** | **ACTCGATCATCGCACACAAT** | **TCGTGATTGCTCTTGTCCAG** |
| ***Abd-B*** | **GGAGCTGGAGAAGGAGTTTC** | **TGCTGCTCGAATTGTTGTTG** |
| ***AhcyL2*** | **CTCAACGAGGTCATCAGGAC** | **ATCCACTTGAGAACGGACAC** |
| ***Irc*** | **ATCCAAAGGGGGAGAGATCA** | **CCACAATGAGGTCCACATCA** |
| ***Dad*** | **GTTTGAGTCTGAGTCAGGGG** | **TCAACATATCGTCGCAGGAG** |
| ***CG15431*** | **TTGTGGTTGTTCTTGGCTCT** | **GCCAGTTGTTGCAGTAGTTG** |
| ***ine*** | **GTCCTGTTCGTCTGTGTCAT** | **ACGTTCTTCGACAGTCTTCC** |
| ***dpy*** | **CGGTTTTGGATACCCTTCCA** | **TCCATTTGAACAGACCTCGG** |
| ***CG11929*** | **AGCCTTCAGATCCTTCAACG** | **TGCGTTCCTCGTGTATATCG** |
| ***slf*** | **CTATGGATGGTTCTGGTCCG** | **GTACACGTTGTTCAACACGG** |
